# Supplementary material for: The brown adipocyte protein CIDEA promotes lipid droplet fusion via a phosphatidic acid-binding amphipathic helix
Source: eLife journal article supplement (doi:10.7554/elife.07485), 2015-11-26
Supplement: supp [file elife-07485-supp-v1.zip]

## SUPPORTING INFORMATION

**Table S1. List of yeast strains used in this study.**

| Strain and Ref.                                                                                                  | Genotype                                                                                                                                                                                                                                                                                                                       | Source        |
|------------------------------------------------------------------------------------------------------------------|--------------------------------------------------------------------------------------------------------------------------------------------------------------------------------------------------------------------------------------------------------------------------------------------------------------------------------|---------------|
| <b>Wild type (BY4742) (1)</b>                                                                                    | <i>MAT<math>\alpha</math></i> ; <i>his3<math>\Delta</math>1</i> , <i>leu2<math>\Delta</math>0</i> , <i>lys2<math>\Delta</math>0</i> , <i>ura3<math>\Delta</math>0</i> carrying pRS316-CYC1p ( <i>URA3 CEN6 CIDEA</i> )                                                                                                         |               |
| <b><i>dgk1<math>\Delta</math></i> (2)</b>                                                                        | <i>dgk1::KanMX</i> , <i>his3<math>\Delta</math>1</i> , <i>leu2<math>\Delta</math>0</i> , <i>lys3<math>\Delta</math>0</i> , <i>ura3<math>\Delta</math>0</i> carrying pRS316-CYC1p ( <i>URA3 CEN6 CIDEA</i> )                                                                                                                    | M.L. Gaspar   |
| <b><i>dgk1<math>\Delta</math>pah1<math>\Delta</math></i> (2, 3)</b>                                              | <i>dgk1::KanMX pah1<math>\Delta</math>::LEU2</i> , <i>his3<math>\Delta</math>1</i> , <i>leu2<math>\Delta</math>0</i> , <i>lys3<math>\Delta</math>0</i> , <i>ura3<math>\Delta</math>00</i> carrying pRS316-CYC1p ( <i>URA3 CEN6 CIDEA</i> )                                                                                     | M.L. Gaspar   |
| <b><i>cho2<math>\Delta</math></i> (4)</b>                                                                        | <i>cho2::KanMX his3<math>\Delta</math>1</i> , <i>leu2<math>\Delta</math>0</i> , <i>lys3<math>\Delta</math>0</i> , <i>ura3<math>\Delta</math>0</i> carrying pRS316-CYC1p ( <i>URA3 CEN6 CIDEA</i> )                                                                                                                             | S.A. Henry    |
| <b><i>pld1<math>\Delta</math></i> (5)</b>                                                                        | <i>pld1::HIS3</i> , <i>his3<math>\Delta</math>1</i> , <i>leu2<math>\Delta</math>0</i> , <i>ura3<math>\Delta</math>0</i> carrying pRS316-CYC1p ( <i>URA3 CEN6 CIDEA</i> )                                                                                                                                                       | S.A. Henry    |
| <b><i>dga1<math>\Delta</math>lro1<math>\Delta</math>are1<math>\Delta</math>are2<math>\Delta</math></i> (6-8)</b> | <i>dga1::KanMX</i> , <i>lro1::KanMX</i> , <i>are1::KanMX</i> , <i>are2::KanMX</i> , <i>his3<math>\Delta</math>1</i> , <i>leu2<math>\Delta</math>0</i> , <i>lys2<math>\Delta</math>0</i> , <i>ura3<math>\Delta</math>0</i> carrying pRS316-CYC1p ( <i>URA3 CEN6 CIDEA</i> )                                                     | S.D. Kohlwein |
| <b><i>tgl3<math>\Delta</math>tgl4<math>\Delta</math>tgl5<math>\Delta</math></i> (9, 10)</b>                      | <i>tgl3::KanMX</i> , <i>tgl4::KanMX</i> , <i>tgl5::KanMX</i> , <i>his3<math>\Delta</math>1</i> , <i>leu2<math>\Delta</math>0</i> , <i>lys2<math>\Delta</math>0</i> , <i>ura3<math>\Delta</math>0</i> carrying pRS316-CYC1p ( <i>URA3 CEN6 CIDEA</i> )                                                                          | S.D. Kohlwein |
| <b><i>PAH1-7A</i> (11, 12)</b>                                                                                   | <i>MAT<math>\alpha</math></i> ; <i>his3<math>\Delta</math>1</i> , <i>leu2<math>\Delta</math>0</i> , <i>lys2<math>\Delta</math>0</i> , <i>ura3<math>\Delta</math>0</i> carrying pRS415- <i>PAH1</i> <sup>S110A/S114A/S168A/S602A/T723A/S744A/S748A</sup> ( <i>LEU2 CEN6 PAH1-7A</i> ) + pRS316-CYC1p ( <i>URA3 CEN6 CIDEA</i> ) | This study    |

1. Brachmann CB, Davies A, Cost GJ, Caputo E, Li J, Hieter P, et al. Designer deletion strains derived from *Saccharomyces cerevisiae* S288C: a useful set of strains and plasmids for PCR-mediated gene disruption and other applications. *Yeast*. 1998;14(2):115-32.
2. Han GS, O'Hara L, Carman GM, Siniossoglou S. An unconventional diacylglycerol kinase that regulates phospholipid synthesis and nuclear membrane growth. *J Biol Chem*. 2008;283(29):20433-42.
3. Santos-Rosa H, Leung J, Grimsey N, Peak-Chew S, Siniossoglou S. The yeast lipin Smp2 couples phospholipid biosynthesis to nuclear membrane growth. *EMBO J*. 2005;24(11):1931-41.
4. Summers EF, Letts VA, McGraw P, Henry SA. *Saccharomyces cerevisiae* cho2 mutants are deficient in phospholipid methylation and cross-pathway regulation of inositol synthesis. *Genetics*. 1988;120(4):909-22.
5. Rose K, Rudge SA, Frohman MA, Morris AJ, Engebrecht J. Phospholipase D signaling is essential for meiosis. *Proc Natl Acad Sci U S A*. 1995;92(26):12151-5.
6. Oelkers P, Tinkelenberg A, Erdeniz N, Cromley D, Billheimer JT, Sturley SL. A lecithin cholesterol acyltransferase-like gene mediates diacylglycerol esterification in yeast. *J Biol Chem*. 2000;275(21):15609-12.
7. Oelkers P, Cromley D, Padamsee M, Billheimer JT, Sturley SL. The DGA1 gene determines a second triglyceride synthetic pathway in yeast. *J Biol Chem*. 2002;277(11):8877-81.
8. Sandager L, Gustavsson MH, Stahl U, Dahlqvist A, Wiberg E, Banas A, et al. Storage lipid synthesis is non-essential in yeast. *J Biol Chem*. 2002;277(8):6478-82.
9. Athenstaedt K, Daum G. Tgl4p and Tgl5p, two triacylglycerol lipases of the yeast *Saccharomyces cerevisiae* are localized to lipid particles. *J Biol Chem*. 2005;280(45):37301-9.
10. Kurat CF, Wolinski H, Petschnigg J, Kaluarachchi S, Andrews B, Natter K, et al. Cdk1/Cdc28-dependent activation of the major triacylglycerol lipase Tgl4 in yeast links lipolysis to cell-cycle progression. *Mol Cell*. 2009;33(1):53-63.
11. Choi HS, Su WM, Morgan JM, Han GS, Xu Z, Karanasios E, et al. Phosphorylation of phosphatidate phosphatase regulates its membrane association and physiological functions in *Saccharomyces cerevisiae*: identification of SER(602), THR(723), AND SER(744) as the sites phosphorylated by CDC28 (CDK1)-encoded cyclin-dependent kinase. *J Biol Chem*. 2010;286(2):1486-98.
12. Choi HS, Su WM, Han GS, Plote D, Xu Z, Carman GM. Pho85p-Pho80p phosphorylation of yeast Pah1p phosphatidate phosphatase regulates its activity, location, abundance, and function in lipid metabolism. *J Biol Chem*. 2012;287(14):11290-301.
