# Supplementary material for: The brown adipocyte protein CIDEA promotes lipid droplet fusion via a phosphatidic acid-binding amphipathic helix
Source: eLife journal article supplement (doi:10.7554/elife.07485), 2015-11-26
Supplement: supp [file elife-07485-supp-v1.zip]

## Figure 5-Figure Supplement 1

Secondary structure estimation of CIDEA amino acids 158-185 (wild type and F166R/V169R/L170R) based on Circular Dichroism data by using CDPro software with base set 4 (43 soluble proteins) using the CONTINLL program.

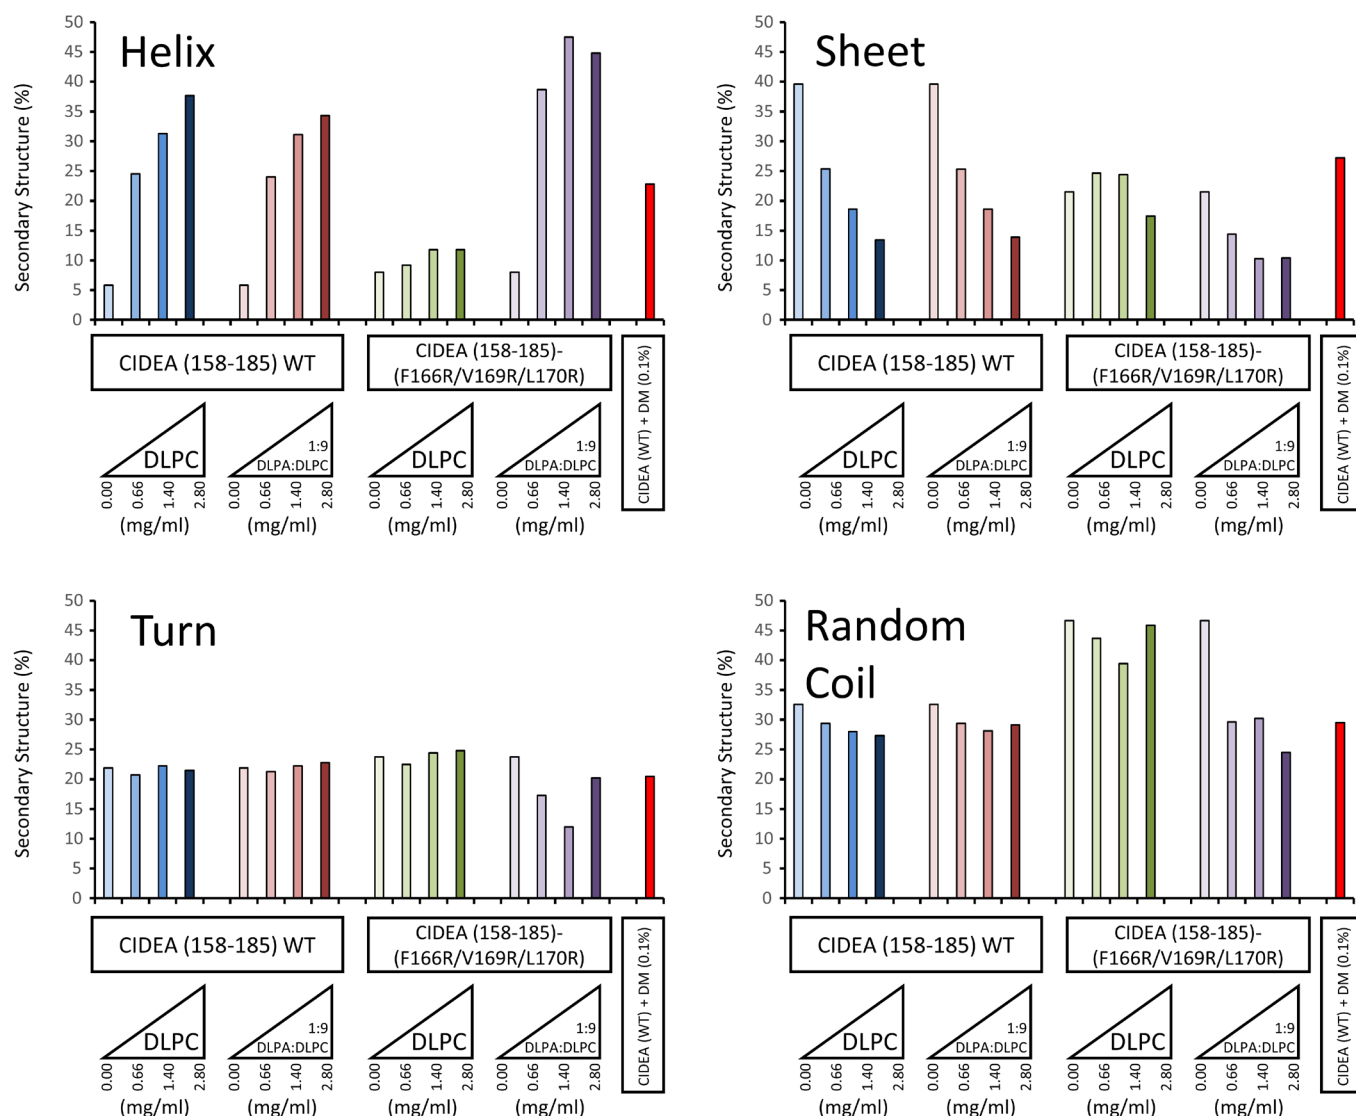

DM = 0.1% n-dodecyl- $\beta$ -D-maltopyranoside
