# Supplementary material for: The brown adipocyte protein CIDEA promotes lipid droplet fusion via a phosphatidic acid-binding amphipathic helix
Source: eLife journal article supplement (doi:10.7554/elife.07485), 2015-11-26
Supplement: supp [file elife-07485-supp-v1.zip]

Figure 2 – Figure Supplement 1

```

mCIDEA      1  METAR----DYAGALIRPLTFMGLQTKKVLTP---LIHPARFPRVSNHDRSSRRGVMASSLQELISKTLQDVLVIT?GL 72
mCIDEB      1  MEYL----SAFNPNGLLRSVSTVSSSELSRRVWNS---APPPQRFPRVCDHKRTVRKGLTAASLQELLQKVLQTLTLLR-GV 72
mCIDEA      1  MDYAMKSLSLYPRSLSRHVAVSTAVVTQQLVSKPSRETTPRARPCRVSTADRQKVRKGIMAHSLQEDLLNKVQDILKQK 80
          *:          .  *  *  *:          .  :  :  .          **  **  .  .  *  *:  *  **  *:  .  *  :
          .  .  .  .  .  .  .  .  .  .  .  .  .  .  .  .  .  .  .  .  .  .  .  .  .  .  .  .  .  .  .  .  .  .

mCIDEA      73  VTLVLEEDGTVDTEEFFQTLRDNTHFMILEKGQKWT?SSKY-----VPVCKQPKKSC?ARVTFDLYRLNPKDFLGCL 145
mCIDEB      73  LTLVLEEDGTAVDSEDFQLEDDTCLMVLEQGSWSPEKSGMLSY---GLGREKPKHSHK?IARITFDVYKQNPRLDFGSL 149
mCIDEA      81  FSLVLEEDGTIVETEYFQALAKDTMFMVLLKGQKWK?PSEQRKKRAQLALSQKPTKKID?ARVTFDLYKLNPKDFIGCL 160
          .:*****  *:  *:  *:  *  .  *:  *:  *:  *:  *  *  *  *  *  *  *  *  *  *  *  *  *  *  *  *  *  *
          .:*****  *:  *:  *:  *  .  *:  *:  *:  *:  *  *  *  *  *  *  *  *  *  *  *  *  *  *  *  *  *  *

mCIDEA      146  NVKATMYEMYSVSYDIRCTSFKAFLRNLLREMSYAAQMTGQFLVYAGTYMLRVLGDTEEQSPKPSKPGWF-----M 217
mCIDEB      150  NVKATFYGLYSMSCDFQGVGPKRVLRELLRWTSLLQGLGHMLLGISSTLRHVVEGADRWQWHGQRHLH-----S 219
mCIDEA      161  NVKATLYDTYSLSYDLCYKAKRIVKEMLRWTLFSMQATGHMLLGTSSYMQOFLDATEEQPAKAKPSSLLPACLKMLQ 239
          *****  *  *:  *  *:  *  *  *:  *:  *:  *  *  *:  *:  .  :  :  :  :  :  .

```
