# Supplementary figures and images for: The brown adipocyte protein CIDEA promotes lipid droplet fusion via a phosphatidic acid-binding amphipathic helix
Source: eLife journal article supplement (doi:10.7554/elife.07485), 2015-11-26

A

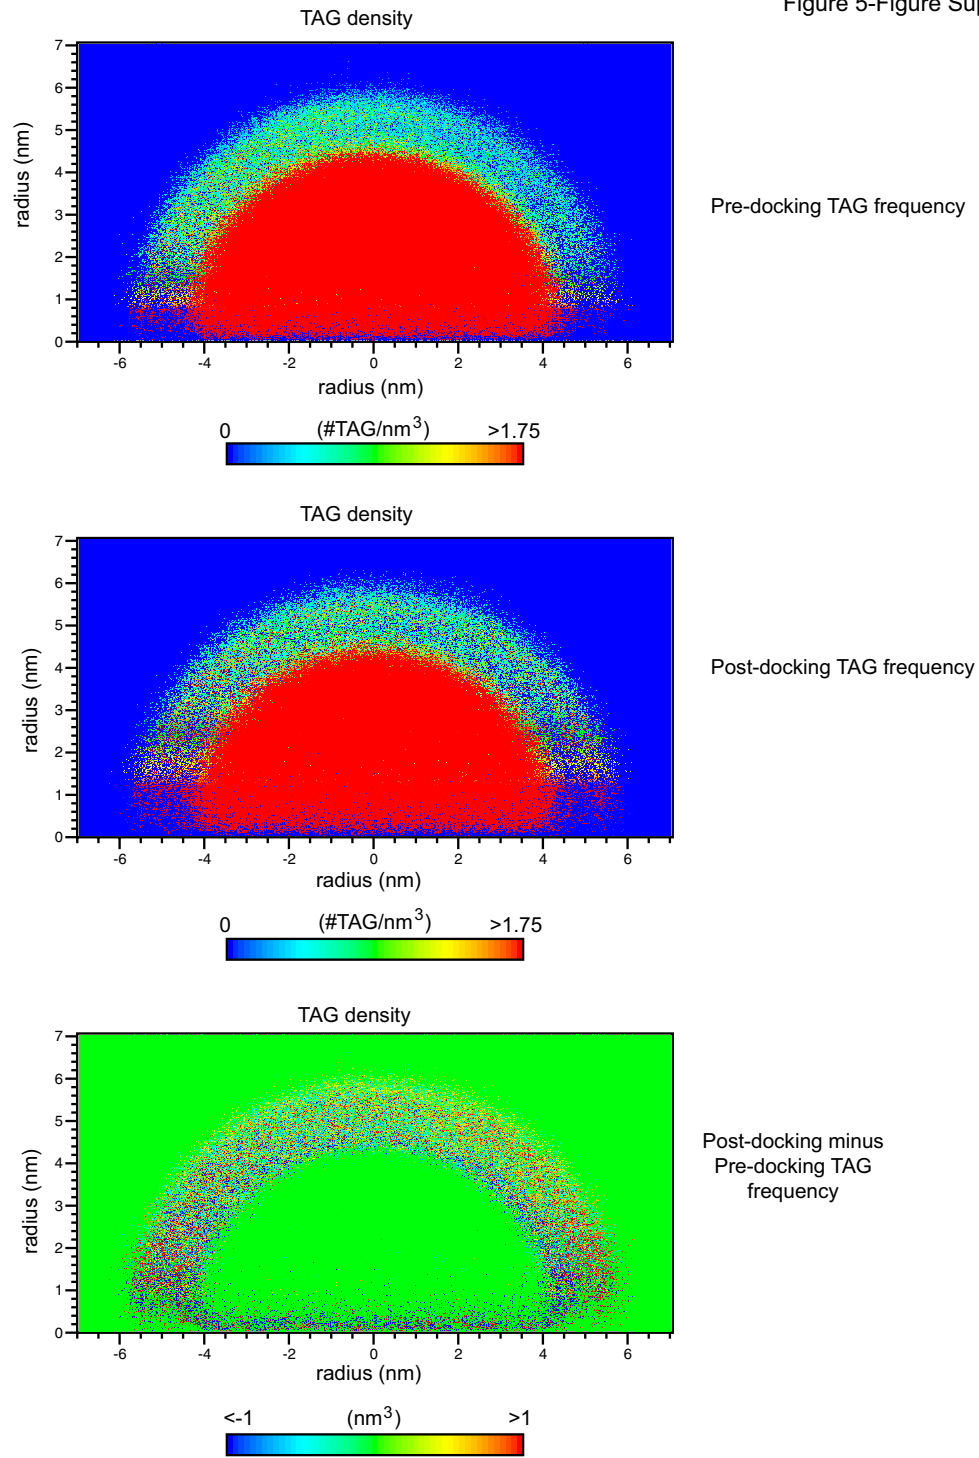

B

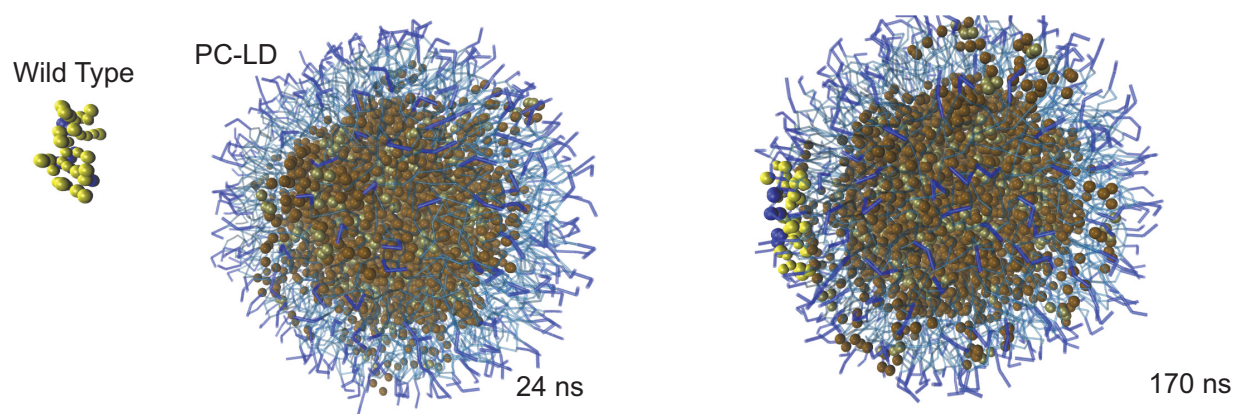

Supplement: supp [file elife-07485-supp-v1.zip]

Fig. 3 – Figure Supplement 1

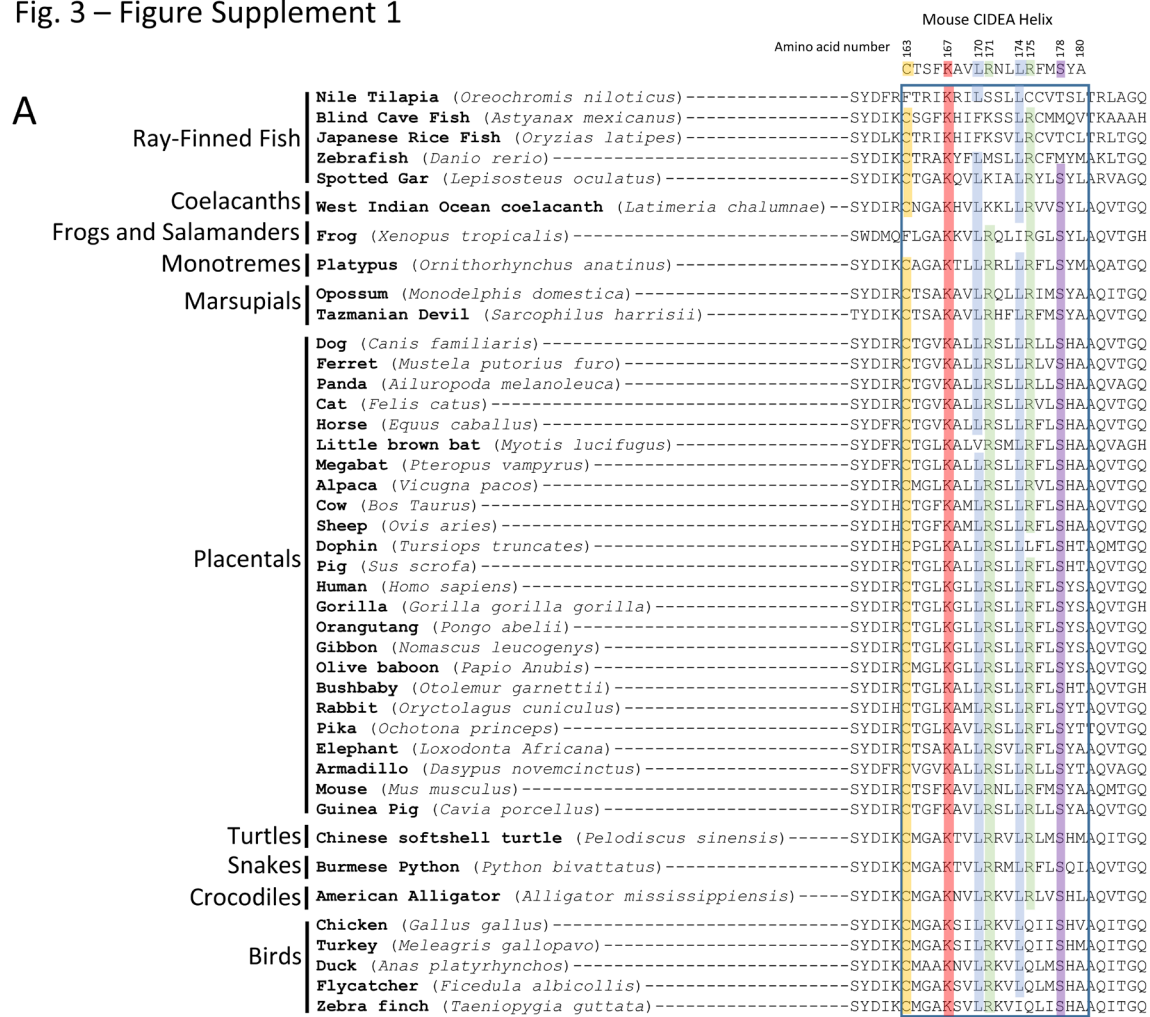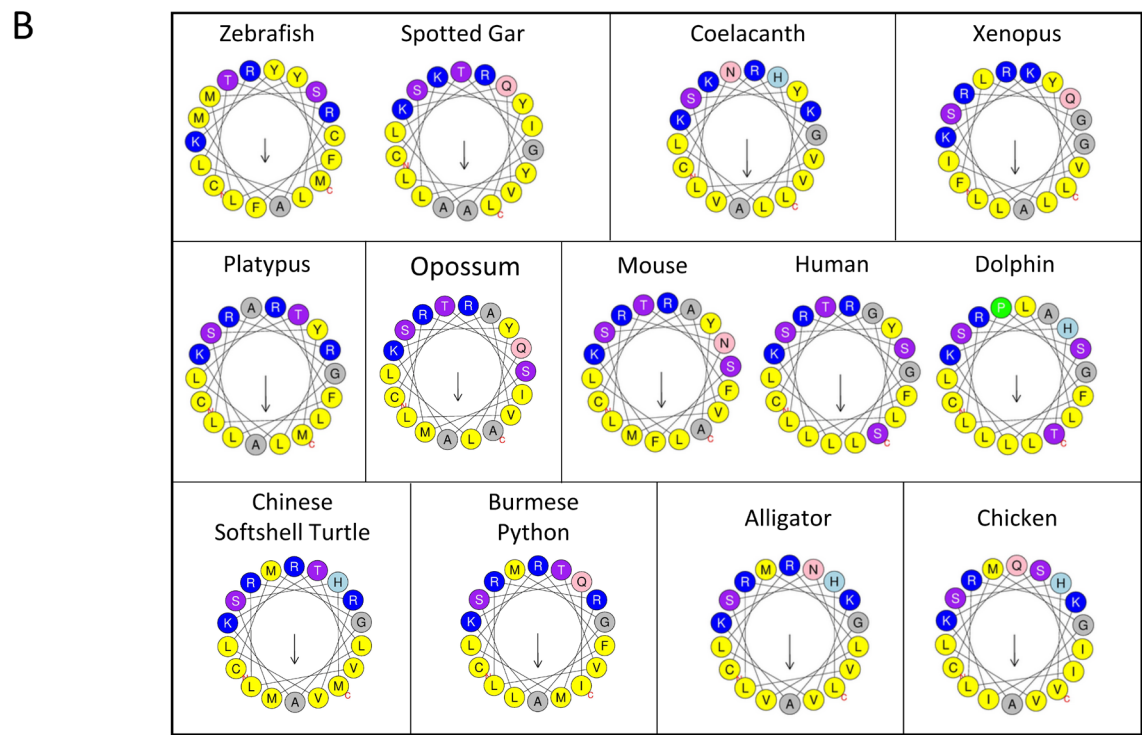

Supplement: supp [file elife-07485-supp-v1.zip]

Figure 3 -Figure Supplement 2

PC-LD Wild Type

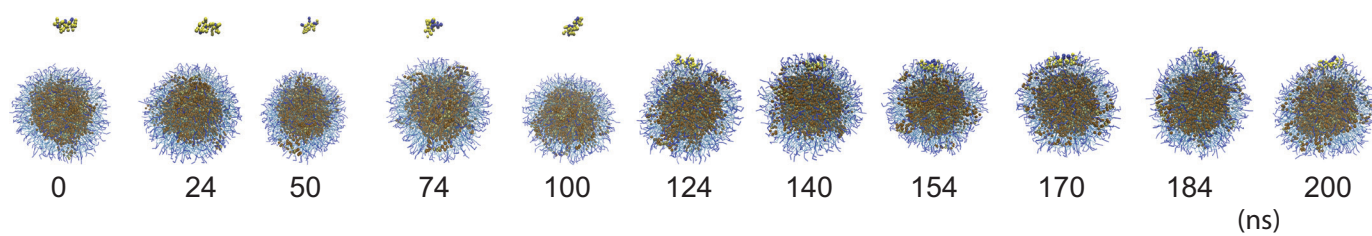

PC-LD K167E/R171E/R175E

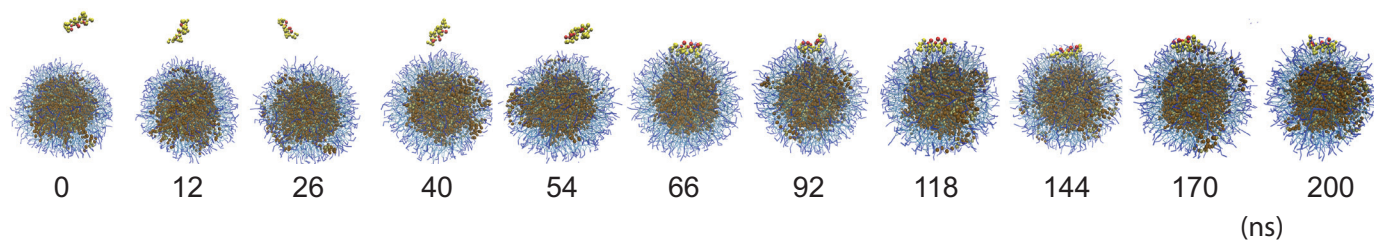

PC:PA-LD Wild Type

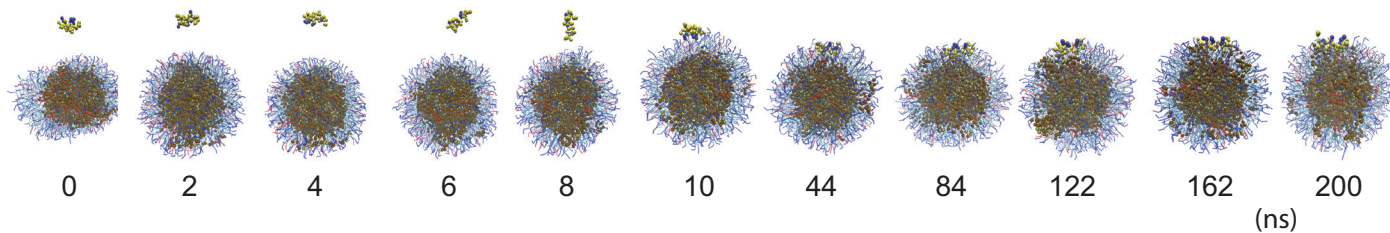

PC:PA-LD K167E/R171E/R175E

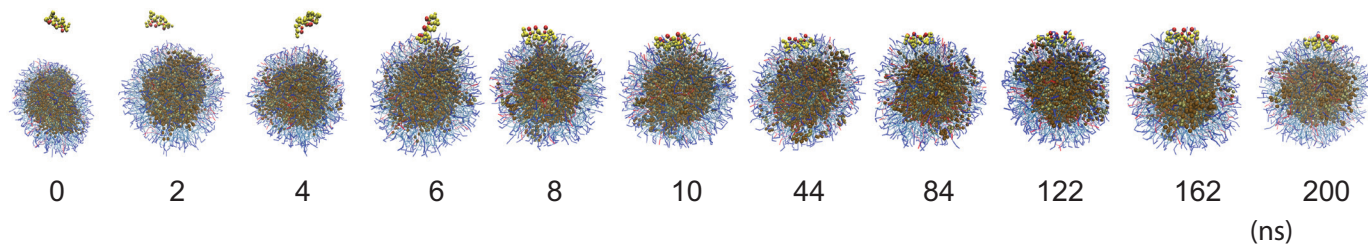

Supplement: supp [file elife-07485-supp-v1.zip]

A

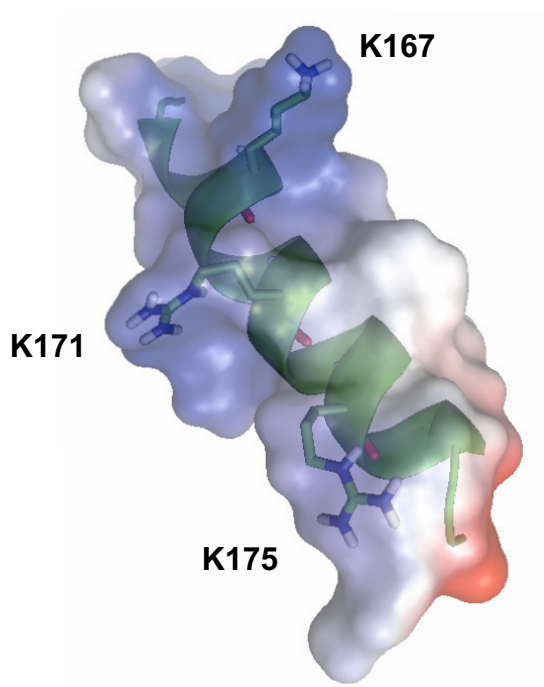

B

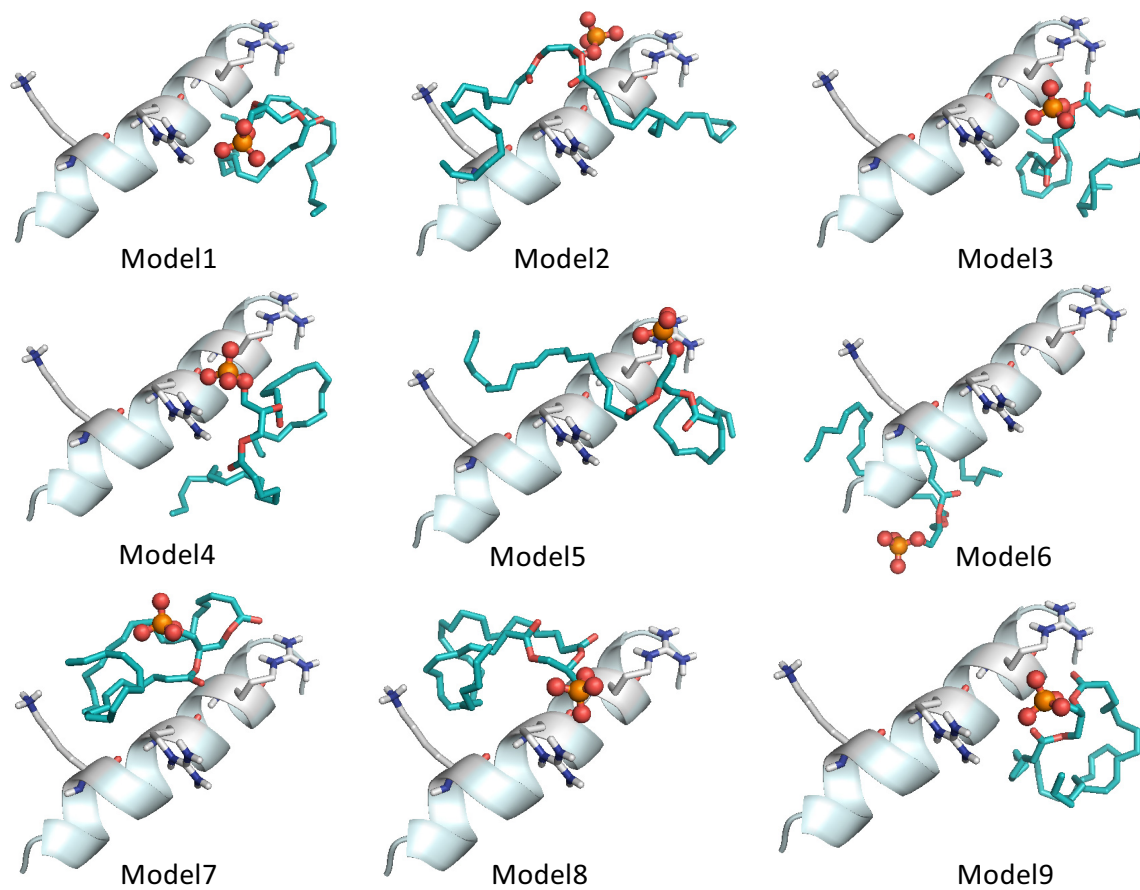

Supplement: supp [file elife-07485-supp-v1.zip]
